# Supplementary material for: Exploring the Influence of P3HT on PTCA Crystallization and Phase Behavior in Thin Films
Source: MDPI journal article supplement (doi:10.3390/nano13222918), 2023-11-08
Supplement: s1 [file s1]

# Exploring the Influence of P3HT on PTCA Crystallization and Phase Behavior in Thin Films

Pallavi Kumari<sup>1\*</sup>, Barbara Hajduk<sup>1</sup>, Henryk Bednarski<sup>1</sup>, Paweł Jarka<sup>2</sup>, Henryk Janeczek<sup>1</sup>, Mieczysław Łapkowski<sup>1,3</sup>

1 Centre of Polymer and Carbon Materials, Polish Academy of Sciences, 34 Marie Curie-Skłodowska str., 41-819 Zabrze, Poland.

2 Department of Engineering Materials and Biomaterials, Silesian University of Technology, 18a Konarskiego str., 41-100 Gliwice, Poland.

3. Department of Physical Chemistry and Technology of Polymers, Silesian University of Technology, Faculty of Chemistry, M. Strzody 9, 44-100 Gliwice, Poland

\* Correspondence: pkumari@cmpw-pan.pl

**Citation:** To be added by editorial staff during production.

Academic Editor:

Received: date

Revised: date

Accepted: date

Published: date

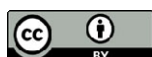

**Copyright:** © 2023 by the authors. Submitted for possible open access publication under the terms and conditions of the Creative Commons Attribution (CC BY) license (<https://creativecommons.org/licenses/by/4.0/>).

## 1. Results

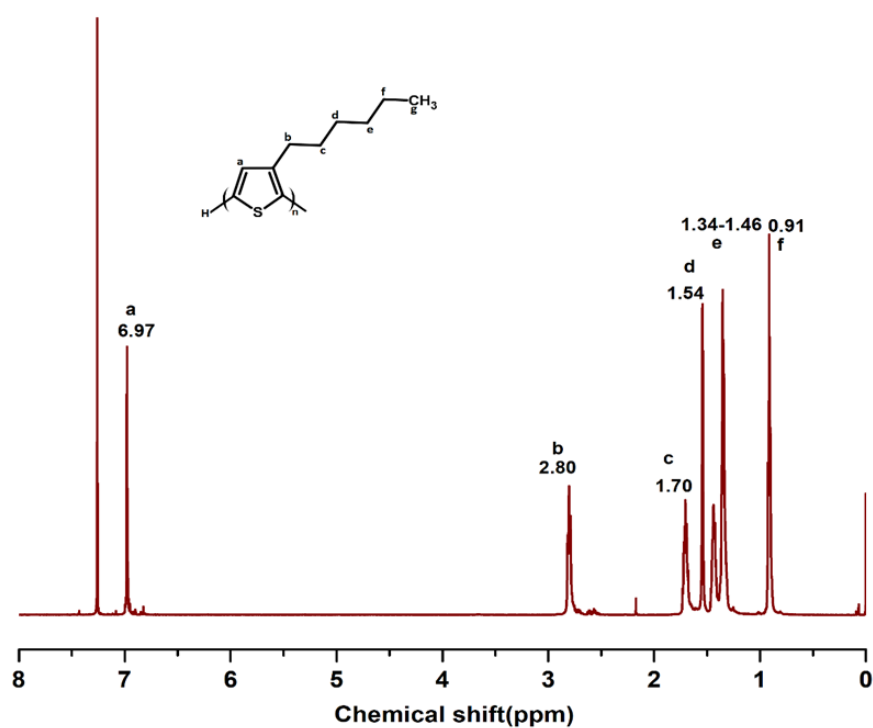

**Figure S1.**  $^1\text{H}$  nuclear magnetic resonance (NMR) of P3HT.

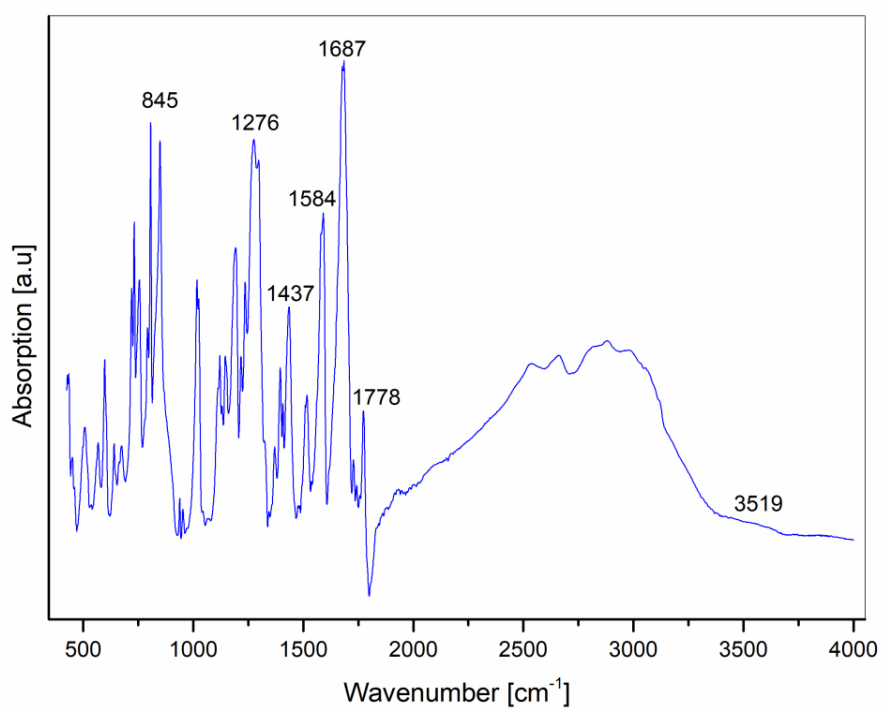

**Figure S2.** Fourier-transform infrared (FT-IR)–ATR of PTCA-SMs.

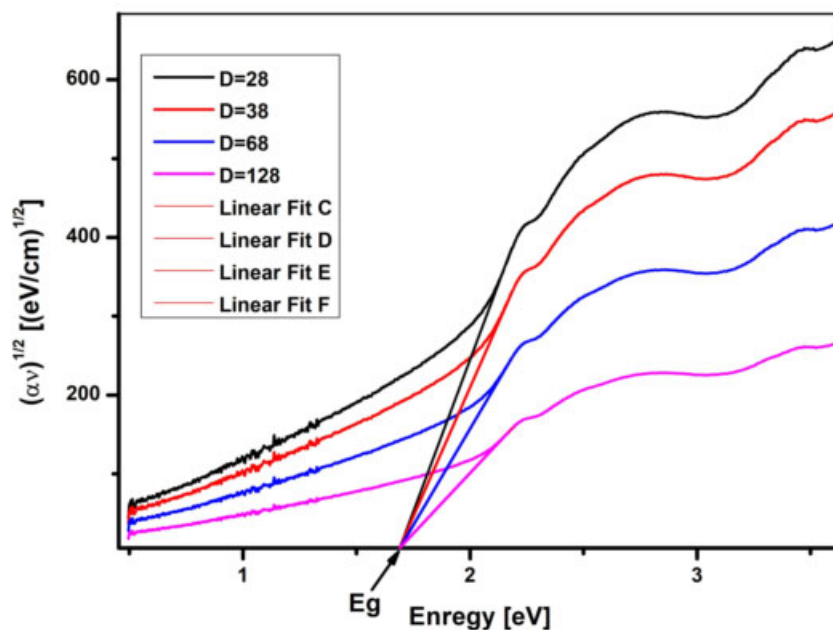

Figure S3. Energy gap of PTCA-SMs with different thickness of thin films.

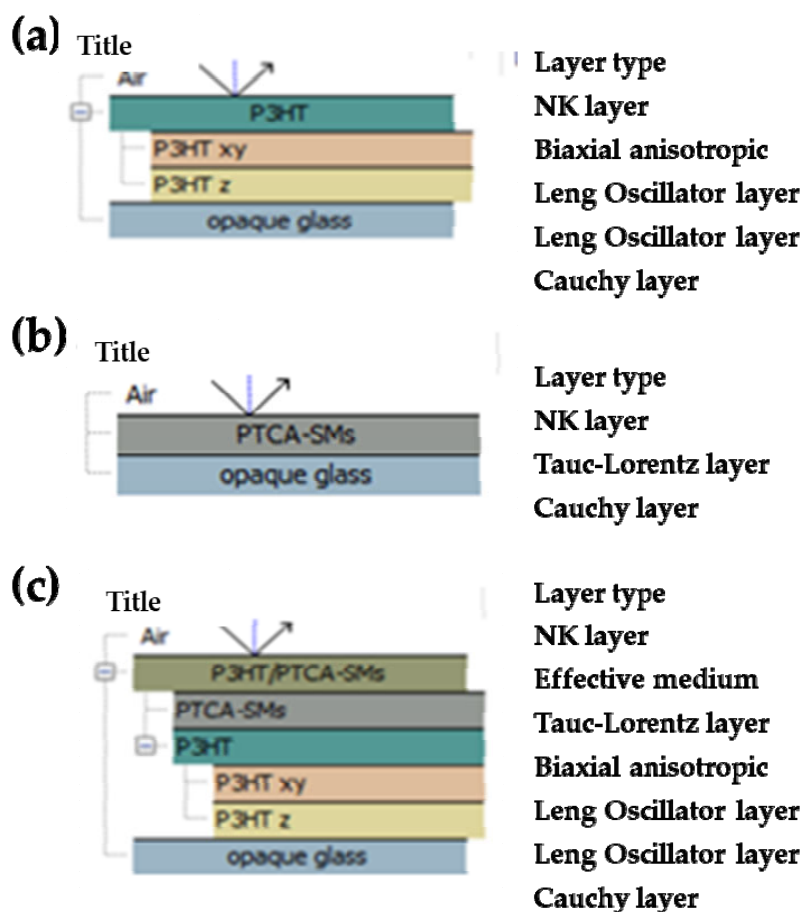

Figure S4. Ellipsometric Models of (a) P3HT, (b) PTCA-SMs, and (c) P3HT:PTCA-SMs.

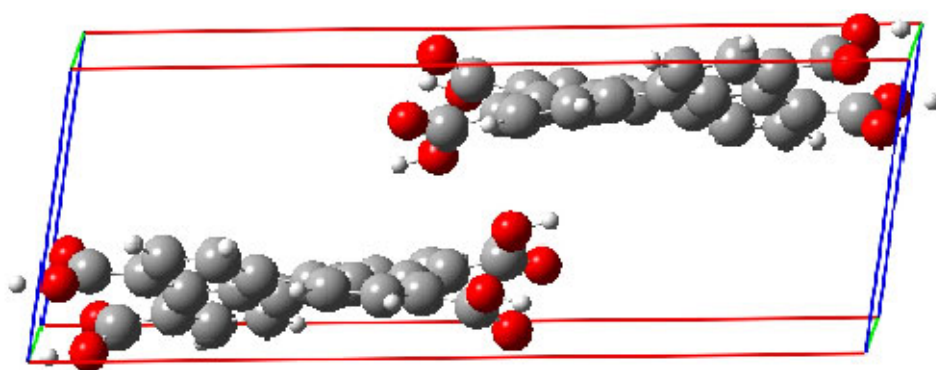

a)

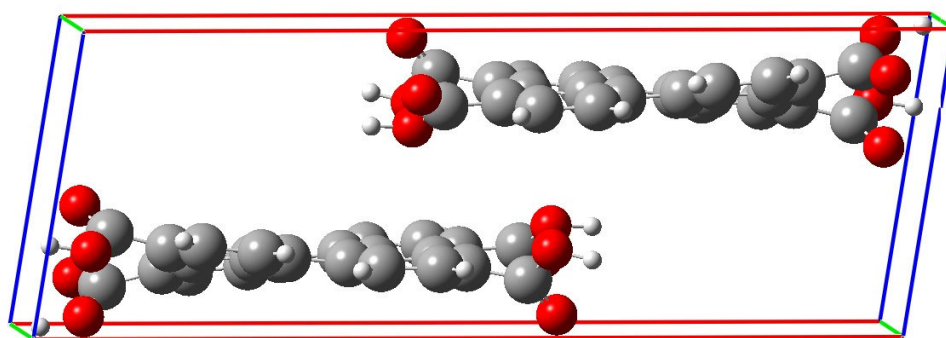

b)

**Figure S5.** Comparison of PTCA-SMs distribution in elementary cells determined based on semi-empirical calculations using (a) MOPAC2016 and matching to the X-ray pattern with (b) EXPO2014 software.

## Surface roughness calculation

The root mean square roughness -  $R_q$  was applied for surface characterization of investigated samples. The  $R_q$  is defined with the following equation:

$$R_q = \sqrt{\frac{1}{m} \sum_{i=1}^m (Z_i - \bar{Z})^2}$$

where the  $m$  parameter is number of sampled points,  $Z_i$  is height of individual point and  $\bar{Z}$  is average height value [1].  $R_q$  was determined for three surface sizes:  $2 \times 2$ ,  $5 \times 5$  and  $20 \times 20$   $\mu\text{m}$  and these values are showed in graph E1 below:

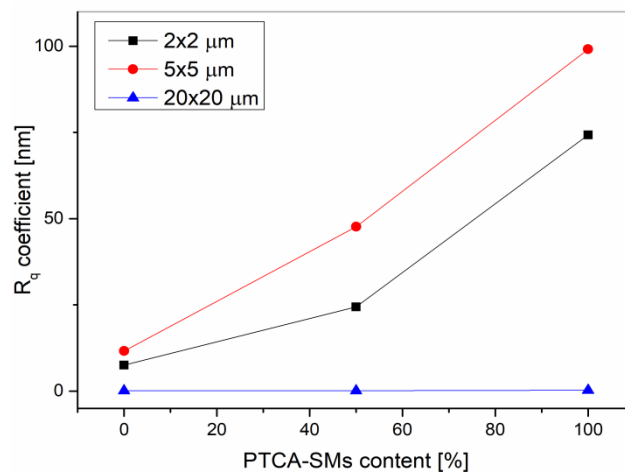

**Figure S6.** The mean square root of the roughness of tested samples.

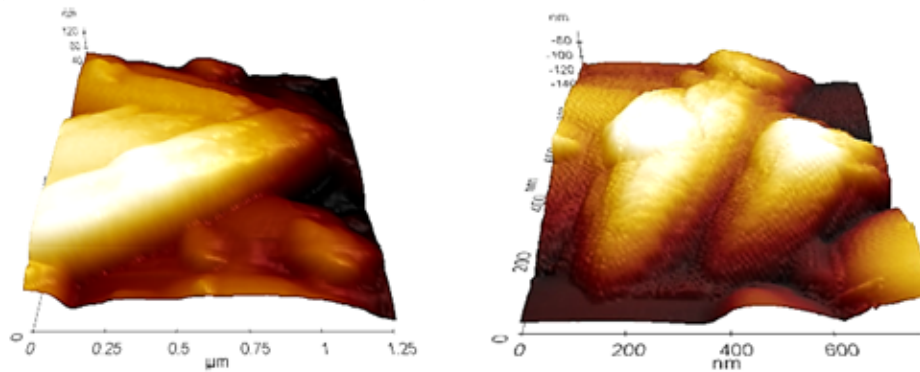

**Figure S7.**  $1.25 \times 1.25$  and  $0.7 \times 0.7$  topographic 3d images of crystallites visible in P3HT: PTCA-SMs blend surface.

## References

- [1] Borgesi, A.; Tallarida, G.; Amore, G.; Cazzaniga, F.; Queirolo, F.; Alessandri, M.; Sassela, A. Influence of roughness and grain dimension on the optical functions of polycrystalline silicon films. *Thin Solid Film* **1998**, 313-314, 243–247. DOI: 10.1016/S0040-6090(97)00826-2.
